# Supplementary material for: Status of the undisturbed mangroves at Brunei Bay, East Malaysia: a preliminary assessment based on remote sensing and ground-truth observations
Source: PeerJ. 2018 Feb 20;6:e4397. doi: 10.7717/peerj.4397 (PMC5824673; doi:10.7717/peerj.4397)
Supplement: File S2 — Raw data for Menumbok. [file peerj-06-4397-s002.xlsx]

## Sheet: Read me !
INPUT DATA :			For the nearest tree in each quadrant :
	Number of sample points		ID	Identity
m	Number of species		d	Sample-point to tree-bark distance
	Species' nomenclature		G130	Girth(s) for one or more stems
			h	Height
N.B. For aggregated trees distance d should be measured to the centre of the colony instead of the nearest tree.
OUTPUT DATA :			For each tree :
qt	Total number of quadrants		D130	Diameter(s) for one or more stems
q0	Number of empty quadrants		Ba	Basal area
%MST	Proportion of multiple-stemmed trees		For each species :
	Mean number of stems in multiple-stemmed trees		De	Absolute density
mean h	Mean height		Ba	Absolute basal area
De	Total forest density		F	Absolute frequency
De'	Total forest density (corrected for empty quadrats)		Der	Relative density
Ba	Total basal area		Dor	Relative dominance (= relative basal area)
F	Total frequency		Fr	Relative frequency
C.I.	Complexity Index (Holdridge et al., 1971)		I.V.	Importance Value (Curtis, 1959)
	with variations sensu Blanco et al. (2001)
P	Presence/sample point (only given on calculations worksheet)
FILE STRUCTURE :
Licese Agreement : to be carefully read and accepted by the user
Worksheet 'Read me !' : to be carefully read by the user
Worksheet 'Raw INPUT data' : this is the only sheet to be completed by the user
Worksheet 'OUTPUT Summary' : sheet with results
Worksheet 'Calculations' : summary of the raw data and individual calculations (see paper)
Worksheet 'Database criteria' : criteria for calculation formulae involving databases
COMPLETING AND CHECKING THE 'Raw INPUT data' WORKSHEET in 10 SIMPLE STEPS :
1. only cells that need to be filled can be filled, i.e. the blue box, the green box and all white cells
2. START by completing the number of sample points, the number of species and the nth nearest tree considered in the field
3. the file automatically lists the species and sample points to be filled
4. THEN complete the species' nomenclature
5. the file automatically provides the abbreviation that must be used in the species ID column
6. FINALLY, complete the data in the white cells for records (rows) that are preceded by a sample point number.
7. note that inconsistent data and errors (e.g. erroneous abbreviation) will be displayed in the orange columns
8. if anything cannot be calculated it will show '#N/A' on the summary file and you should check error messages
9. even if all summary calculations are available, there may still be input errors that influenced them (see black box)
10. trace the input errors using the bright yellow column, read the error message in the orange column, and correct
IMPORTANT VERSION NOTES :
Version 1.01	Basic version (published as peer-reviewed paper with aforementioned reference)
Version 2.01	Note that for single-stemmed trees d is to be measured up to the tree bark, but the interface recomputes it automatically to the centre of the tree. For MST distance d is directly measured to the centre of the colony in the field.
Version 3.01	The architecture of a MST tree composed of three stems with a radius of 2 cm is clearly different from that of a single-stemmed tree with a radius of 6 cm. When conducting biomass studies (in which basal area and height of the tree is considered) averaging the basal areas of the individual stems in a MST underestimates the true basal area of the tree (and the biomass), whereas summing them overes…
Version 4.01	From this version onwards the user has the choice to insert distance measures to the first nearest tree (default), to the second nearest tree, or to the third nearest tree. Each of these has its own density estimator (Pollard, 1971). Note that earlier versions of P-DATA-PRO used the simple density estimator = (average distance)-2 (Cintrón & Schaeffer-Novelli, 1984) when comparing different studie…
Version 5.01	In previous versions the basal area of a MST is calculated as the sum of basal areas of its different truks, instead of being based on the basal area of the sum of diameters of its trunks.

## Sheet: Raw INPUT data
Sample point	Quadrant	Species ID	ERROR messages	Sample point to tree-bark Distance d	Height h	Girth G130 of a single-stemmed tree or of all stems of a multiple-stemmed tree																					Number of ERROR messages		FILL the total number of SAMPLE POINTS in the BLUE box to the right (max. 100)				20
				(m)	(m)	(cm)																					0		FILL the total number of tree SPECIES in the GREEN box to the right (max. 30)				4
																													FILL which nth nearest tree was measured from each sample point in each quadrant: 1 = first nearest tree (default), 2 = second nearest tree, 3 = third nearest tree				1
																													Nomenclature		Genus	Species	Abbreviation
1	a	R.api	R.api	3	14	147.7
1	b	N.fru	N.fru	3.5	7	785.7																							species	1	Ceriops	sp.	C.sp.
1	c	N.fru	N.fru	1.7	7.5	251.4																							species	2	Nypa	fruticans	N.fru
1	d	N.fru	N.fru	2.2	8	220																							species	3	Rhizophora	apiculata	R.api
2	a																												species	4	Xylocarpus	granatum	X.gra
2	b	N.fru	N.fru	1.5	7	125.7
2	c	N.fru	N.fru	1.5	7.5	220
2	d	N.fru	N.fru	2.6	7	157.1
3	a
3	b	R.api	R.api	4.6	18	377.1
3	c	R.api	R.api	3.5	17	314.3
3	d	N.fru	N.fru	2.6	8	361.4
4	a
4	b	N.fru	N.fru	2	10	188.6
4	c
4	d	N.fru	N.fru	1.3	9	220
5	a	R.api	R.api	2.6	18	251.4
5	b	N.fru	N.fru	2.5	9	440
5	c	N.fru	N.fru	1.4	10	314.3
5	d	N.fru	N.fru	2.4	9	440
6	a
6	b	R.api	R.api	1	15	94.3
6	c
6	d	N.fru	N.fru	3.2	10	672.6
7	a	R.api	R.api	4.2	18	361.4
7	b
7	c
7	d	N.fru	N.fru	3.3	9	257.7
8	a	R.api	R.api	2.2	15	336.3
8	b	N.fru	N.fru	4.5	8	235.7
8	c	N.fru	N.fru	0.8	7	345.7
8	d	N.fru	N.fru	1.9	7	298.6
9	a	R.api	R.api	1.3	15	188.6
9	b	N.fru	N.fru	0.6	6	691.4
9	c	R.api	R.api	2.5	14	128.9
9	d	N.fru	N.fru	2.3	7	323.7
10	a	R.api	R.api	3.3	13	172.9
10	b
10	c	N.fru	N.fru	1.5	7	248.3
10	d	N.fru	N.fru	1.3	6	462
11	a	R.api	R.api	4.5	15	440
11	b
11	c	R.api	R.api	3.6	15	140
11	d	R.api	R.api	4.2	15	314.3
12	a	R.api	R.api	4	8	20
12	b	R.api	R.api	2.3	10	30
12	c	R.api	R.api	4.2	18	487.1
12	d
13	a	X.gra	X.gra	3.6	15	94.3
13	b	R.api	R.api	3.7	18	145
13	c	R.api	R.api	2.7	12	119.4
13	d	R.api	R.api	4.7	15	120
14	a	R.api	R.api	2.8	17	124
14	b	X.gra	X.gra	4.4	15	106.9
14	c
14	d	R.api	R.api	2	13	40
15	a	R.api	R.api	2.4	18	330
15	b	R.api	R.api	3.1	14	138.3
15	c	R.api	R.api	4	20	120
15	d	X.gra	X.gra	1.9	8	94.3
16	a	R.api	R.api	3.4	14	59.7
16	b	R.api	R.api	4.7	13	103.7
16	c	R.api	R.api	4.1	15	130
16	d
17	a	R.api	R.api	2	11	15.7
17	b
17	c	C.sp.	C.sp.	3.3	9	30
17	d	R.api	R.api	3	12	35
18	a	X.gra	X.gra	2.9	15	70
18	b	R.api	R.api	3.3	11	7.9
18	c	R.api	R.api	1.7	11	20
18	d	X.gra	X.gra	3.3	8	20
19	a	R.api	R.api	4.7	18	377.1
19	b	R.api	R.api	3.2	10	29.9
19	c	R.api	R.api	5	18	110
19	d	X.gra	X.gra	3.7	10	22
20	a	R.api	R.api	3.3	20	480.9
20	b	X.gra	X.gra	3	10	50
20	c	R.api	R.api	3.3	10	30
20	d	R.api	R.api	0.4	20	300

## Sheet: OUTPUT Summary
Summary of PCQM based forestry parameters
sensu Dahdouh-Guebas & Koedam (2006) using P-DATA-PRO_100 (Version 5.01)
Results for the total forest or vegetation assemblage :
•	Number of PCQM sample points			20
•	Total number of quadrants			80
•	Number of empty quadrants			14
•	Number of tree species			4
•	Distances measured from the sample point to the			FIRST nearest tree in each quadrant
•	Proportion of multiple-stemmed trees			0	%
•	Mean number of stems in multiple-stemmed trees			#N/A	stems
•	Mean height			12.1818	m
•	Total forest density			0.131287	trees/m2
•	Total forest density (corrected for empty quadrats)			0.108312	trees/m2
•	Total forest density			131.287	trees/0.1ha
•	Total basal area			81.1826	m2/0.1ha
•	Total frequency			175	%
•	Complexity Index (using mean height)			519.347
•	Complexity Index (using modal height)			639.494
•	Complexity Index (using maximal height)			852.659
Results for individual species :
	Genus and species name	De	Ba	F	Der	Dor	Fr	I.V.	rank
		(stems/0.1ha)	(m2/0.1ha)		(%)	(%)	(%)
1	Ceriops sp.	1.9892	0.0142466	5	1.51515	0.0175488	2.85714	4.38984	4
2	Nypa fruticans	41.7732	50.0105	50	31.8182	61.6025	28.5714	121.992	2
3	Rhizophora apiculata	73.6005	30.5643	90	56.0606	37.6488	51.4286	145.138	1
4	Xylocarpus granatum	13.9244	0.593555	30	10.6061	0.731136	17.1429	28.4801	3

## Sheet: Calculations
	Quadrant	Species ID	Distance	Distance	Girth	Diameter	Basal Area	# stems	Height	Presence per sample point (P = sum of all presences per sample points)
			d	d2	G130	D130	Ba		(m)
			(m)		(cm)	(cm)	(m2)		(m)
		Species					Basal Area	Stems		C.sp.	N.fru	R.api	X.gra
1	1a	R.api	3.23507	10.4657	147.7	47.0144	0.173601	1	14	0	1	1	0
1	1b	N.fru	4.75048	22.5671	785.7	250.096	4.91251	1	7
1	1c	N.fru	2.10012	4.41049	251.4	80.0231	0.502945	1	7.5
1	1d	N.fru	2.55014	6.50322	220	70.0282	0.385155	1	8
0	2a									0	1	0	0
1	2b	N.fru	1.70006	2.8902	125.7	40.0116	0.125736	1	7
1	2c	N.fru	1.85014	3.42302	220	70.0282	0.385155	1	7.5
1	2d	N.fru	2.85003	8.12268	157.1	50.0065	0.1964	1	7
0	3a									0	1	1	0
1	3b	R.api	5.20017	27.0418	377.1	120.035	1.13163	1	18
1	3c	R.api	4.00022	16.0018	314.3	100.045	0.786102	1	17
1	3d	N.fru	3.17519	10.0818	361.4	115.037	1.03936	1	8
0	4a									0	1	0	0
1	4b	N.fru	2.30017	5.29076	188.6	60.0332	0.283057	1	10
0	4c
1	4d	N.fru	1.65014	2.72296	220	70.0282	0.385155	1	9
1	5a	R.api	3.00012	9.00069	251.4	80.0231	0.502945	1	18	0	1	1	0
1	5b	N.fru	3.20028	10.2418	440	140.056	1.54062	1	9
1	5c	N.fru	1.90022	3.61085	314.3	100.045	0.786102	1	10
1	5d	N.fru	3.10028	9.61175	440	140.056	1.54062	1	9
0	6a									0	1	1	0
1	6b	R.api	1.15008	1.32269	94.3	30.0166	0.0707642	1	15
0	6c
1	6d	N.fru	4.27048	18.237	672.6	214.095	3.60001	1	10
1	7a	R.api	4.77519	22.8024	361.4	115.037	1.03936	1	18	0	1	1	0
0	7b
0	7c
1	7d	N.fru	3.71014	13.7652	257.7	82.0285	0.528468	1	9
1	8a	R.api	2.73524	7.48153	336.3	107.048	0.900003	1	15	0	1	1	0
1	8b	N.fru	4.87513	23.7669	235.7	75.0256	0.442089	1	8
1	8c	N.fru	1.3502	1.82304	345.7	110.04	0.951018	1	7
1	8d	N.fru	2.37524	5.64175	298.6	95.0473	0.709528	1	7
1	9a	R.api	1.60017	2.56053	188.6	60.0332	0.283057	1	15	0	1	1	0
1	9b	N.fru	1.7004	2.89135	691.4	220.079	3.80407	1	6
1	9c	R.api	2.70515	7.31784	128.9	41.0301	0.13222	1	14
1	9d	N.fru	2.81518	7.92526	323.7	103.037	0.833826	1	7
1	10a	R.api	3.57518	12.7819	172.9	55.0358	0.237892	1	13	0	1	1	0
0	10b
1	10c	N.fru	1.89518	3.59171	248.3	79.0363	0.490618	1	7
1	10d	N.fru	2.0353	4.14243	462	147.059	1.69853	1	6
1	11a	R.api	5.20028	27.0429	440	140.056	1.54062	1	15	0	0	1	0
0	11b
1	11c	R.api	3.82282	14.6139	140	44.5634	0.155972	1	15
1	11d	R.api	4.70022	22.0921	314.3	100.045	0.786102	1	15
1	12a	R.api	4.03183	16.2557	20	6.3662	0.0031831	1	8	0	0	1	0
1	12b	R.api	2.34775	5.51191	30	9.5493	0.00716197	1	10
1	12c	R.api	4.97524	24.7531	487.1	155.049	1.88811	1	18
0	12d
1	13a	X.gra	3.75008	14.0631	94.3	30.0166	0.0707642	1	15	0	0	1	1
1	13b	R.api	3.93077	15.451	145	46.1549	0.167312	1	18
1	13c	R.api	2.89003	8.35228	119.4	38.0062	0.113449	1	12
1	13d	R.api	4.89099	23.9217	120	38.1972	0.114592	1	15
1	14a	R.api	2.99735	8.98412	124	39.4704	0.122358	1	17	0	0	1	1
1	14b	X.gra	4.57014	20.8861	106.9	34.0273	0.090938	1	15
0	14c
1	14d	R.api	2.06366	4.2587	40	12.7324	0.0127324	1	13
1	15a	R.api	2.92521	8.55686	330	105.042	0.866599	1	18	0	0	1	1
1	15b	R.api	3.32011	11.0231	138.3	44.0223	0.152207	1	14
1	15c	R.api	4.19099	17.5644	120	38.1972	0.114592	1	20
1	15d	X.gra	2.05008	4.20284	94.3	30.0166	0.0707642	1	8
1	16a	R.api	3.49502	12.2151	59.7	19.0031	0.0283621	1	14	0	0	1	0
1	16b	R.api	4.86504	23.6686	103.7	33.0087	0.0855751	1	13
1	16c	R.api	4.3069	18.5494	130	41.3803	0.134486	1	15
0	16d
1	17a	R.api	2.02499	4.10057	15.7	4.99747	0.00196151	1	11	1	0	1	0
0	17b
1	17c	C.sp.	3.34775	11.2074	30	9.5493	0.00716197	1	9
1	17d	R.api	3.0557	9.33733	35	11.1408	0.00974824	1	12
1	18a	X.gra	3.01141	9.06858	70	22.2817	0.038993	1	15	0	0	1	1
1	18b	R.api	3.31257	10.9731	7.9	2.51465	0.000496643	1	11
1	18c	R.api	1.73183	2.99924	20	6.3662	0.0031831	1	11
1	18d	X.gra	3.33183	11.1011	20	6.3662	0.0031831	1	8
1	19a	R.api	5.30017	28.0918	377.1	120.035	1.13163	1	18	0	0	1	1
1	19b	R.api	3.24759	10.5468	29.9	9.51747	0.00711431	1	10
1	19c	R.api	5.17507	26.7814	110	35.0141	0.0962887	1	18
1	19d	X.gra	3.73501	13.9503	22	7.00282	0.00385155	1	10
1	20a	R.api	4.06538	16.5273	480.9	153.075	1.84035	1	20	0	0	1	1
1	20b	X.gra	3.07958	9.4838	50	15.9155	0.0198944	1	10
1	20c	R.api	3.34775	11.2074	30	9.5493	0.00716197	1	10
1	20d	R.api	0.877465	0.769945	300	95.493	0.716197	1	20
80	= qt	mean d =	3.21363		m		% MST =	0	12.1818	= mean h (m)								COMPLEXITY INDEX (mean h) =	519.347
66	= qn	De =	0.131287	0.131287	trees/m2		mean # stems in MST =	#DIV/0!	15	= modal h (m)								COMPLEXITY INDEX (modal h) =	639.494
14	= q0	De' =	0.108312	0.108312	trees/m2				20	= max h (m)								COMPLEXITY INDEX (max h) =	852.659
									4	= # species
DENSITY							BASAL AREA / DOMINANCE					FREQUENCY					I.V.	species rank
presence		# in total	De (stems/0.1ha)	Der			mean Ba (m2)	Ba by species (m2)	Dor			P	F	Fr
1	C.sp.	0.0151515	1.9892	1.51515	%	C.sp.	0.00716197	0.0142466	0.0175488	%	C.sp.	1	5	2.85714	%	C.sp.	4.38984	4
21	N.fru	0.318182	41.7732	31.8182	%	N.fru	1.19719	50.0105	61.6025	%	N.fru	10	50	28.5714	%	N.fru	121.992	2
37	R.api	0.560606	73.6005	56.0606	%	R.api	0.415273	30.5643	37.6488	%	R.api	18	90	51.4286	%	R.api	145.138	1
7	X.gra	0.106061	13.9244	10.6061	%	X.gra	0.0426269	0.593555	0.731136	%	X.gra	6	30	17.1429	%	X.gra	28.4801	3
66		TOTAL	131.287	100	%		TOTAL	81.1826	100	%		TOTAL	175	100	%

## Sheet: Database Criteria
DATABASE CRITERIA (Do not modify !!!)
	Species		Stems
species 1	C.sp.		>1
	Species
species 2	N.fru
	Species
species 3	R.api
	Species
species 4	X.gra
