# Supplementary material for: Status of the undisturbed mangroves at Brunei Bay, East Malaysia: a preliminary assessment based on remote sensing and ground-truth observations
Source: PeerJ. 2018 Feb 20;6:e4397. doi: 10.7717/peerj.4397 (PMC5824673; doi:10.7717/peerj.4397)
Supplement: File S3 — Raw data for Sundar. [file peerj-06-4397-s003.xlsx]

## Sheet: Read me !
INPUT DATA :			For the nearest tree in each quadrant :
	Number of sample points		ID	Identity
m	Number of species		d	Sample-point to tree-bark distance
	Species' nomenclature		G130	Girth(s) for one or more stems
			h	Height
N.B. For aggregated trees distance d should be measured to the centre of the colony instead of the nearest tree.
OUTPUT DATA :			For each tree :
qt	Total number of quadrants		D130	Diameter(s) for one or more stems
q0	Number of empty quadrants		Ba	Basal area
%MST	Proportion of multiple-stemmed trees		For each species :
	Mean number of stems in multiple-stemmed trees		De	Absolute density
mean h	Mean height		Ba	Absolute basal area
De	Total forest density		F	Absolute frequency
De'	Total forest density (corrected for empty quadrats)		Der	Relative density
Ba	Total basal area		Dor	Relative dominance (= relative basal area)
F	Total frequency		Fr	Relative frequency
C.I.	Complexity Index (Holdridge et al., 1971)		I.V.	Importance Value (Curtis, 1959)
	with variations sensu Blanco et al. (2001)
P	Presence/sample point (only given on calculations worksheet)
FILE STRUCTURE :
Licese Agreement : to be carefully read and accepted by the user
Worksheet 'Read me !' : to be carefully read by the user
Worksheet 'Raw INPUT data' : this is the only sheet to be completed by the user
Worksheet 'OUTPUT Summary' : sheet with results
Worksheet 'Calculations' : summary of the raw data and individual calculations (see paper)
Worksheet 'Database criteria' : criteria for calculation formulae involving databases
COMPLETING AND CHECKING THE 'Raw INPUT data' WORKSHEET in 10 SIMPLE STEPS :
1. only cells that need to be filled can be filled, i.e. the blue box, the green box and all white cells
2. START by completing the number of sample points, the number of species and the nth nearest tree considered in the field
3. the file automatically lists the species and sample points to be filled
4. THEN complete the species' nomenclature
5. the file automatically provides the abbreviation that must be used in the species ID column
6. FINALLY, complete the data in the white cells for records (rows) that are preceded by a sample point number.
7. note that inconsistent data and errors (e.g. erroneous abbreviation) will be displayed in the orange columns
8. if anything cannot be calculated it will show '#N/A' on the summary file and you should check error messages
9. even if all summary calculations are available, there may still be input errors that influenced them (see black box)
10. trace the input errors using the bright yellow column, read the error message in the orange column, and correct
IMPORTANT VERSION NOTES :
Version 1.01	Basic version (published as peer-reviewed paper with aforementioned reference)
Version 2.01	Note that for single-stemmed trees d is to be measured up to the tree bark, but the interface recomputes it automatically to the centre of the tree. For MST distance d is directly measured to the centre of the colony in the field.
Version 3.01	The architecture of a MST tree composed of three stems with a radius of 2 cm is clearly different from that of a single-stemmed tree with a radius of 6 cm. When conducting biomass studies (in which basal area and height of the tree is considered) averaging the basal areas of the individual stems in a MST underestimates the true basal area of the tree (and the biomass), whereas summing them overes…
Version 4.01	From this version onwards the user has the choice to insert distance measures to the first nearest tree (default), to the second nearest tree, or to the third nearest tree. Each of these has its own density estimator (Pollard, 1971). Note that earlier versions of P-DATA-PRO used the simple density estimator = (average distance)-2 (Cintrón & Schaeffer-Novelli, 1984) when comparing different studie…
Version 5.01	In previous versions the basal area of a MST is calculated as the sum of basal areas of its different truks, instead of being based on the basal area of the sum of diameters of its trunks.

## Sheet: Raw INPUT data
Sample point	Quadrant	Species ID	ERROR messages	Sample point to tree-bark Distance d	Height h	Girth G130 of a single-stemmed tree or of all stems of a multiple-stemmed tree																					Number of ERROR messages		FILL the total number of SAMPLE POINTS in the BLUE box to the right (max. 100)				19
				(m)	(m)	(cm)																					0		FILL the total number of tree SPECIES in the GREEN box to the right (max. 30)				6
																													FILL which nth nearest tree was measured from each sample point in each quadrant: 1 = first nearest tree (default), 2 = second nearest tree, 3 = third nearest tree				1
																													Nomenclature		Genus	Species	Abbreviation
1	a
1	b																												species	1	Sonneratia	caseolaris	S.cas
1	c																												species	2	Sonneratia	alba	S.alb
1	d	S.cas	S.cas	4.7	10	56.6																							species	3	Avicennia	alba	A.alb
2	a																												species	4	Rhizophora	apiculata	R.api
2	b																												species	5	Xylocarpus	granatum	X.gra
2	c	S.alb	S.alb	5	13	449.4																							species	6	Nypa	fruticans	N.fru
2	d
3	a	A.alb	A.alb	3	10	84.9
3	b	S.alb	S.alb	4.8	9	232.6
3	c
3	d
4	a	S.cas	S.cas	4	11	132
4	b
4	c
4	d
5	a
5	b
5	c	S.cas	S.cas	4.7	10	56.6
5	d
6	a
6	b
6	c
6	d	S.alb	S.alb	3.2	14	166.6
7	a
7	b	S.alb	S.alb	3	13	53.4
7	c
7	d	A.alb	A.alb	4.8	12	75.4
8	a
8	b	S.alb	S.alb	3	9	69.1
8	c	S.alb	S.alb	4.6	14	91.1
8	d
9	a	S.cas	S.cas	3.6	5	15.7
9	b
9	c
9	d	S.alb	S.alb	4.7	20	226.3
10	a	R.api	R.api	4.5	13	90
10	b	X.gra	X.gra	4.9	12	223.1
10	c	R.api	R.api	2.2	10	70
10	d	R.api	R.api	2.7	9	30
11	a	R.api	R.api	3.4	12	44
11	b	R.api	R.api	4.1	17	251.4
11	c	R.api	R.api	2	12	50
11	d	R.api	R.api	2.6	15	97
12	a	R.api	R.api	1.8	13	43
12	b
12	c	R.api	R.api	5	16	110
12	d	R.api	R.api	3.6	15	74
13	a	R.api	R.api	4.2	9	22
13	b	R.api	R.api	4.7	18	130
13	c	R.api	R.api	4.4	14	72
13	d	N.fru	N.fru	4.1	5	10
14	a	N.fru	N.fru	4.8	4	76
14	b
14	c	R.api	R.api	2.5	18	130
14	d
15	a	R.api	R.api	4.8	19	220
15	b	R.api	R.api	4.6	8	172.9
15	c	X.gra	X.gra	3.3	15	78.6
15	d
16	a	X.gra	X.gra	2.3	15	260.9
16	b	R.api	R.api	4.5	12	44
16	c	R.api	R.api	4	12	53
16	d
17	a	N.fru	N.fru	0.9	7.8	440
17	b	N.fru	N.fru	0.12	7.8	282.9
17	c	X.gra	X.gra	4.4	12	248.3
17	d	R.api	R.api	2.1	5	10
18	a	X.gra	X.gra	4.8	9	40
18	b
18	c	N.fru	N.fru	2	7	104
18	d	N.fru	N.fru	0.8	7	112
19	a	X.gra	X.gra	3	13	80
19	b	N.fru	N.fru	1.5	7	584.6
19	c	X.gra	X.gra	4.4	10	86
19	d	N.fru	N.fru	1.9	8	97

## Sheet: OUTPUT Summary
Summary of PCQM based forestry parameters
sensu Dahdouh-Guebas & Koedam (2006) using P-DATA-PRO_100 (Version 5.01)
Results for the total forest or vegetation assemblage :
•	Number of PCQM sample points			19
•	Total number of quadrants			76
•	Number of empty quadrants			29
•	Number of tree species			6
•	Distances measured from the sample point to the			FIRST nearest tree in each quadrant
•	Proportion of multiple-stemmed trees			0	%
•	Mean number of stems in multiple-stemmed trees			#N/A	stems
•	Mean height			11.417	m
•	Total forest density			0.133025	trees/m2
•	Total forest density (corrected for empty quadrats)			0.0822654	trees/m2
•	Total forest density			133.025	trees/0.1ha
•	Total basal area			33.2441	m2/0.1ha
•	Total frequency			163.158	%
•	Complexity Index (using mean height)			302.936
•	Complexity Index (using modal height)			318.405
•	Complexity Index (using maximal height)			530.675
Results for individual species :
	Genus and species name	De	Ba	F	Der	Dor	Fr	I.V.	rank
		(stems/0.1ha)	(m2/0.1ha)		(%)	(%)	(%)
1	Sonneratia caseolaris	11.3213	0.542299	21.0526	8.51064	1.63126	12.9032	23.0451	5
2	Sonneratia alba	19.8122	7.90456	31.5789	14.8936	23.7773	19.3548	58.0258	3
3	Avicennia alba	5.66063	0.290392	10.5263	4.25532	0.873515	6.45161	11.5804	6
4	Rhizophora apiculata	53.776	5.24738	42.1053	40.4255	15.7844	25.8065	82.0164	1
5	Xylocarpus granatum	19.8122	4.52867	31.5789	14.8936	13.6225	19.3548	47.8709	4
6	Nypa fruticans	22.6425	14.7308	26.3158	17.0213	44.311	16.129	77.4613	2

## Sheet: Calculations
	Quadrant	Species ID	Distance	Distance	Girth	Diameter	Basal Area	# stems	Height	Presence per sample point (P = sum of all presences per sample points)
			d	d2	G130	D130	Ba		(m)
			(m)		(cm)	(cm)	(m2)		(m)
		Species					Basal Area	Stems		S.cas	S.alb	A.alb	R.api	X.gra	N.fru
0	1a									1	0	0	0	0	0
0	1b
0	1c
1	1d	S.cas	4.79008	22.9449	56.6	18.0163	0.0254931	1	10
0	2a									0	1	0	0	0	0
0	2b
1	2c	S.alb	5.71524	32.664	449.4	143.048	1.60715	1	13
0	2d
1	3a	A.alb	3.13512	9.82899	84.9	27.0245	0.0573595	1	10	0	1	1	0	0	0
1	3b	S.alb	5.17019	26.7309	232.6	74.0389	0.430536	1	9
0	3c
0	3d
1	4a	S.cas	4.21008	17.7248	132	42.0169	0.138656	1	11	1	0	0	0	0	0
0	4b
0	4c
0	4d
0	5a									1	0	0	0	0	0
0	5b
1	5c	S.cas	4.79008	22.9449	56.6	18.0163	0.0254931	1	10
0	5d
0	6a									0	1	0	0	0	0
0	6b
0	6c
1	6d	S.alb	3.46515	12.0073	166.6	53.0304	0.220872	1	14
0	7a									0	1	1	0	0	0
1	7b	S.alb	3.08499	9.51716	53.4	16.9977	0.022692	1	13
0	7c
1	7d	A.alb	4.92	24.2064	75.4	24.0006	0.0452411	1	12
0	8a									0	1	0	0	0	0
1	8b	S.alb	3.10998	9.67195	69.1	21.9952	0.0379967	1	9
1	8c	S.alb	4.74499	22.5149	91.1	28.998	0.066043	1	14
0	8d
1	9a	S.cas	3.62499	13.1405	15.7	4.99747	0.00196151	1	5	1	1	0	0	0	0
0	9b
0	9c
1	9d	S.alb	5.06017	25.6053	226.3	72.0335	0.40753	1	20
1	10a	R.api	4.64324	21.5597	90	28.6479	0.0644578	1	13	0	0	0	1	1	0
1	10b	X.gra	5.25507	27.6158	223.1	71.0149	0.396086	1	12
1	10c	R.api	2.31141	5.34261	70	22.2817	0.038993	1	10
1	10d	R.api	2.74775	7.55011	30	9.5493	0.00716197	1	9
1	11a	R.api	3.47003	12.0411	44	14.0056	0.0154062	1	12	0	0	0	1	0	0
1	11b	R.api	4.50012	20.251	251.4	80.0231	0.502945	1	17
1	11c	R.api	2.07958	4.32464	50	15.9155	0.0198944	1	12
1	11d	R.api	2.75438	7.58661	97	30.8761	0.0748744	1	15
1	12a	R.api	1.86844	3.49106	43	13.6873	0.0147139	1	13	0	0	0	1	0	0
0	12b
1	12c	R.api	5.17507	26.7814	110	35.0141	0.0962887	1	16
1	12d	R.api	3.71777	13.8218	74	23.5549	0.0435766	1	15
1	13a	R.api	4.23501	17.9353	22	7.00282	0.00385155	1	9	0	0	0	1	0	1
1	13b	R.api	4.9069	24.0777	130	41.3803	0.134486	1	18
1	13c	R.api	4.51459	20.3815	72	22.9183	0.041253	1	14
1	13d	N.fru	4.11592	16.9408	10	3.1831	0.000795775	1	5
1	14a	N.fru	4.92096	24.2158	76	24.1916	0.0459639	1	4	0	0	0	1	0	1
0	14b
1	14c	R.api	2.7069	7.32732	130	41.3803	0.134486	1	18
0	14d
1	15a	R.api	5.15014	26.524	220	70.0282	0.385155	1	19	0	0	0	1	1	0
1	15b	R.api	4.87518	23.7674	172.9	55.0358	0.237892	1	8
1	15c	X.gra	3.4251	11.7313	78.6	25.0192	0.0491626	1	15
0	15d
1	16a	X.gra	2.71524	7.3725	260.9	83.047	0.541674	1	15	0	0	0	1	1	0
1	16b	R.api	4.57003	20.8852	44	14.0056	0.0154062	1	12
1	16c	R.api	4.08435	16.6819	53	16.8704	0.0223533	1	12
0	16d
1	17a	N.fru	1.60028	2.5609	440	140.056	1.54062	1	7.8	0	0	0	1	1	1
1	17b	N.fru	0.570249	0.325184	282.9	90.0499	0.636878	1	7.8
1	17c	X.gra	4.79518	22.9938	248.3	79.0363	0.490618	1	12
1	17d	R.api	2.11592	4.4771	10	3.1831	0.000795775	1	5
1	18a	X.gra	4.86366	23.6552	40	12.7324	0.0127324	1	9	0	0	0	0	1	1
0	18b
1	18c	N.fru	2.16552	4.68948	104	33.1042	0.086071	1	7
1	18d	N.fru	0.978254	0.95698	112	35.6507	0.099822	1	7
1	19a	X.gra	3.12732	9.78016	80	25.4648	0.0509296	1	13	0	0	0	0	1	1
1	19b	N.fru	2.43042	5.90694	584.6	186.084	2.71962	1	7
1	19c	X.gra	4.53687	20.5832	86	27.3747	0.0588555	1	10
1	19d	N.fru	2.05438	4.22048	97	30.8761	0.0748744	1	8
76	= qt	mean d =	3.69792		m		% MST =	0	11.417	= mean h (m)								COMPLEXITY INDEX (mean h) =	302.936
47	= qn	De =	0.133025	0.133025	trees/m2		mean # stems in MST =	#DIV/0!	12	= modal h (m)								COMPLEXITY INDEX (modal h) =	318.405
29	= q0	De' =	0.0822654	0.0822654	trees/m2				20	= max h (m)								COMPLEXITY INDEX (max h) =	530.675
									6	= # species
DENSITY							BASAL AREA / DOMINANCE					FREQUENCY					I.V.	species rank
presence		# in total	De (stems/0.1ha)	Der			mean Ba (m2)	Ba by species (m2)	Dor			P	F	Fr
4	S.cas	0.0851064	11.3213	8.51064	%	S.cas	0.0479009	0.542299	1.63126	%	S.cas	4	21.0526	12.9032	%	S.cas	23.0451	5
7	S.alb	0.148936	19.8122	14.8936	%	S.alb	0.398974	7.90456	23.7773	%	S.alb	6	31.5789	19.3548	%	S.alb	58.0258	3
2	A.alb	0.0425532	5.66063	4.25532	%	A.alb	0.0513003	0.290392	0.873515	%	A.alb	2	10.5263	6.45161	%	A.alb	11.5804	6
19	R.api	0.404255	53.776	40.4255	%	R.api	0.0975785	5.24738	15.7844	%	R.api	8	42.1053	25.8065	%	R.api	82.0164	1
7	X.gra	0.148936	19.8122	14.8936	%	X.gra	0.22858	4.52867	13.6225	%	X.gra	6	31.5789	19.3548	%	X.gra	47.8709	4
8	N.fru	0.170213	22.6425	17.0213	%	N.fru	0.65058	14.7308	44.311	%	N.fru	5	26.3158	16.129	%	N.fru	77.4613	2
47		TOTAL	133.025	100	%		TOTAL	33.2441	100	%		TOTAL	163.158	100	%

## Sheet: Database Criteria
DATABASE CRITERIA (Do not modify !!!)
	Species		Stems
species 1	S.cas		>1
	Species
species 2	S.alb
	Species
species 3	A.alb
	Species
species 4	R.api
	Species
species 5	X.gra
	Species
species 6	N.fru
